# Supplementary material for: Regulatory T cell transfer ameliorates lymphedema and promotes lymphatic vessel function
Source: JCI journal article supplement (doi:10.1172/jci.insight.89081), 2016-10-05
Supplement: sd1 [file 1]

## Supplementary Materials and Methods

**Table S1.** List of the primer sequences used for SYBR-green RT-PCR

| Gene name             | Gene sequence (5' - 3') |
|-----------------------|-------------------------|
| IFN $\gamma$ forward  | ACACTGCATCTTGGCTTTGC    |
| IFN $\gamma$ reverse  | CTGGCTCTGCAGGATTTTCA    |
| IL13 forward          | CACACAAGACCAGACTCCCC    |
| IL13 reverse          | CCAGGGATGGTCTCTCCTCA    |
| IL4 forward           | AGGTCACAGGAGAAGGGACGCC  |
| IL4 reverse           | TGCGAAGCACCTTGGAAGCCC   |
| TNF $\alpha$ forward  | AGCACAGAAAGCATGATCCG    |
| TNF $\alpha$ reverse  | GTTGCTACGACGTGGGCTA     |
| VEGF-C forward        | GGGGGCGAGGTCAAGGCTTTT   |
| VEGF-C reverse        | CCTGGTATTGAGGGTGGGCTGC  |
| TGF $\beta$ 1 forward | AGAAGAAGTCTGTGTGC GG    |
| TGF $\beta$ 1 reverse | ACTGTGTGTCCAGGCTCCAA    |
| IL10 forward          | ACAGCCGGAAGACAATAACT    |
| IL10 reverse          | GCAGCTCTAGGAGCATGTGG    |
| Rplp0 forward         | AGATTCGGGATATGCTGTTGGC  |
| Rplp0 reverse         | TCGGTCCTAGACCAGTGTTT    |

## Supplementary figures and tables

**Table S2.** Key networks (top-10) down-regulated in lymphedema. Network analysis of the genes up-regulated 2 and 6 weeks post-operatively in comparison to control (un-operated) mice according to RNA sequencing analysis.

| Pathway                                   | P value |
|-------------------------------------------|---------|
| Chemotaxis                                | 1.3E-5  |
| Neurogenesis                              | 2.2E-5  |
| Gonadotropin regulation                   | 3.8E-5  |
| Potassium transport                       | 8.8E-5  |
| Ossification and bone remodeling          | 6.9E-4  |
| Synaptogenesis                            | 1.3E-3  |
| ECM remodeling                            | 2.1E-3  |
| Histamin signaling                        | 2.1E-3  |
| Negative regulation of cell proliferation | 3.6E-3  |
| Progesterone signaling                    | 4.4E-03 |

**Table S3.** Patient characteristics and cell count numbers

| <b>Patient</b>      | <b>Surgical treatment</b>  | <b>Chemotherapy/<br/>Radiotherapy</b> | <b>Average CD45 cell counts/field</b> | <b>Average FOXP3 cell counts/field</b> |
|---------------------|----------------------------|---------------------------------------|---------------------------------------|----------------------------------------|
| <b>Control 1</b>    | Mastectomy                 | Both                                  | 38.4                                  | 3.2                                    |
| <b>Control 2</b>    | Mastectomy                 | Both                                  | 33.4                                  | 1.4                                    |
| <b>Control 3</b>    | Mastectomy + LN dissection | Both                                  | 27                                    | 0.8                                    |
| <b>Control 4</b>    | Lumpectomy                 | Both                                  | 37.6                                  | 2                                      |
| <b>Control 5</b>    | Mastectomy + LN dissection | Both                                  | 34.8                                  | 2.4                                    |
| <b>Lymphedema 1</b> | Mastectomy                 | Both                                  | 68                                    | 8.4                                    |
| <b>Lymphedema 2</b> | Mastectomy + LN dissection | Both                                  | 75.4                                  | 12.8                                   |
| <b>Lymphedema 3</b> | Mastectomy + LN dissection | Both                                  | 70.2                                  | 10                                     |
| <b>Lymphedema 4</b> | Lumpectomy                 | Both                                  | 55                                    | 6.8                                    |
| <b>Lymphedema 5</b> | Mastectomy + LN dissection | Both                                  | 85.4                                  | 13.4                                   |

Further files included with the submission:

**Movies S1:** Dynamics of lymphatic transport in the control group following therapeutic adoptive Treg transfer.

**Movies S2:** Dynamics of lymphatic transport in the treated group following therapeutic adoptive Treg transfer.

**Data files S1:** Differentially expressed genes ( $P < 0.05$ ) 2 weeks post-operatively in comparison to control mice.

**Data files S2:** Differentially expressed genes ( $P < 0.05$ ) 6 weeks post-operatively in comparison to control mice.

**Manuscript referenced in the text:**

E. Gousopoulos, S. T. Proulx, J. Scholl, M. Uecker, M. Detmar, Prominent lymphatic vessel hyperplasia with progressive dysfunction and distinct immune cell infiltration in lymphedema, *Am J Path* (2016) *In press*
